# Supplementary material
Source: PubMed Central journal article supplement (PMC3423581)

## Supplemental Information

**Supplemental Figure 1: Structures of compounds used in this study.** The chemical structure of MPP<sup>+</sup>, rotenone, 6-OHDA, and paraquat are shown.

**Supplemental Figure 2: N27 cell seeding optimization.** N27 cells were seeded to  $2 \times 10^4$ ,  $3 \times 10^4$ ,  $4 \times 10^4$ , or  $5 \times 10^4$  cells/well as indicated in Seahorse Bioscience V7 tissue culture plates. The cells were allowed to incubate for 24 h and then basal OCR and ECAR measurements were recorded (Panel A). N27 cells were seeded to  $4 \times 10^4$  cells/well and allowed to incubate for 24 h. The cells were then washed and changed to assay media containing 0, 1, 5, or 10 mM sodium pyruvate. After 1 h incubation in a non-CO<sub>2</sub> incubator mitochondrial function was assessed. Basal OCR (Panel B) and reserve capacity (Panel C) were calculated. Data shown are the mean  $\pm$  sem. n=5 per treatment group.

**Supplemental Figure 3: Effects of low dose rotenone on mitochondrial function.** N27 cells were seeded to  $4 \times 10^4$  cells/well in Seahorse Bioscience V7 culture plates. The indicated concentration of rotenone was injected after 5 baseline OCR and ECAR measurements, and OCR (Panel A) and ECAR (Panel B) were monitored for an additional 4 h. In a separate experiment, cells were treated with the indicated concentration of rotenone for 4 h. The cells were then washed 2x with serum free media, and OCR was monitored for 8 h. Data shown are the mean  $\pm$  sem. n=5 per treatment group.

**Supplemental Figure 4: Effects of MPP<sup>+</sup>, rotenone, 6-OHDA, and paraquat on mitochondrial function.** The experimental scheme is shown in Panel A. After at least three baseline measurements of OCR, oligomycin, FCCP, and antimycin A are injected in sequence. The indicated parameters of mitochondrial function are indicated on this graph. The effects of MPP<sup>+</sup>, rotenone, 6-OHDA, and paraquat on mitochondrial function are shown in Panels B, C, D, and E respectively. Data shown are the means  $\pm$  sem. n=5 per treatment group.

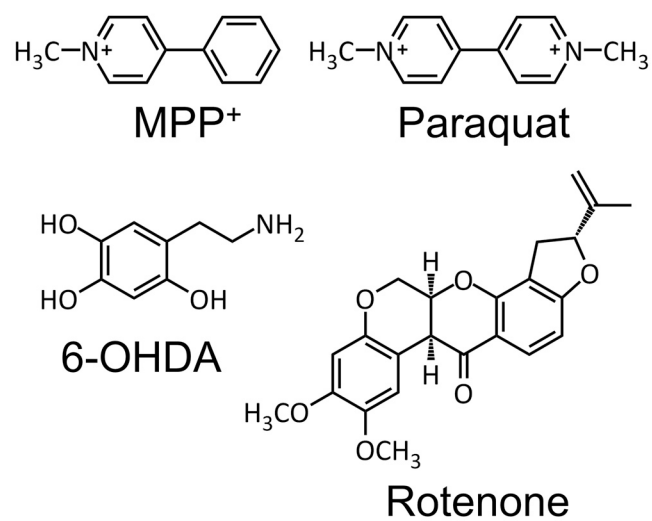

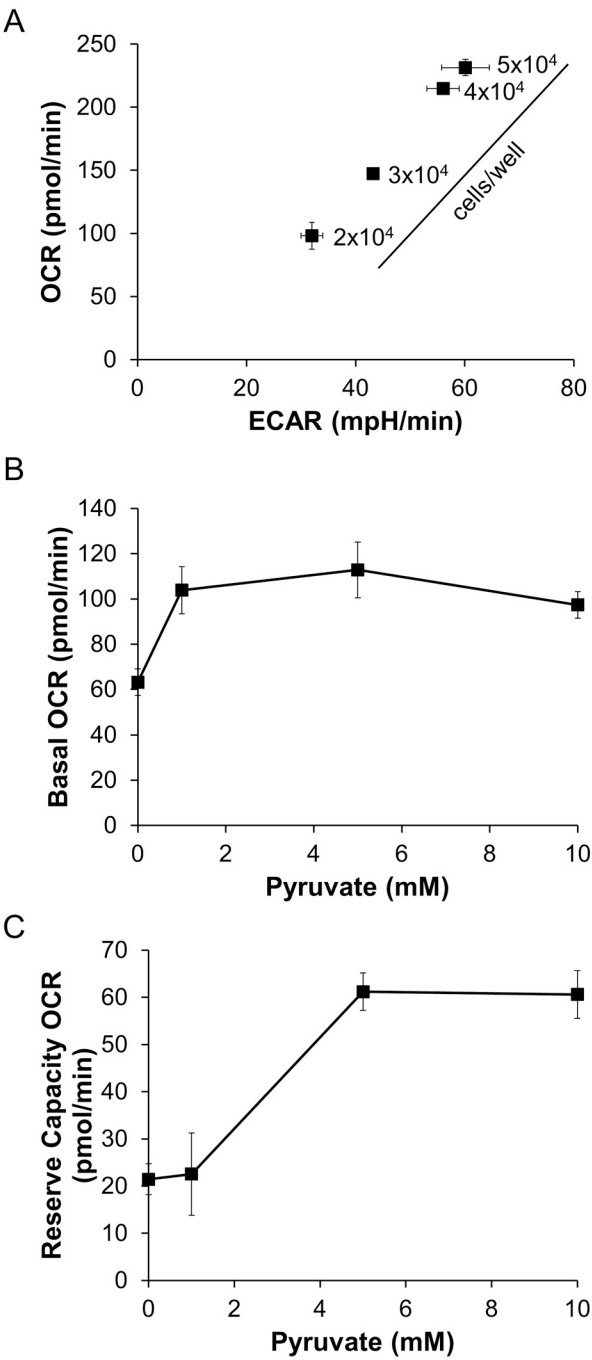

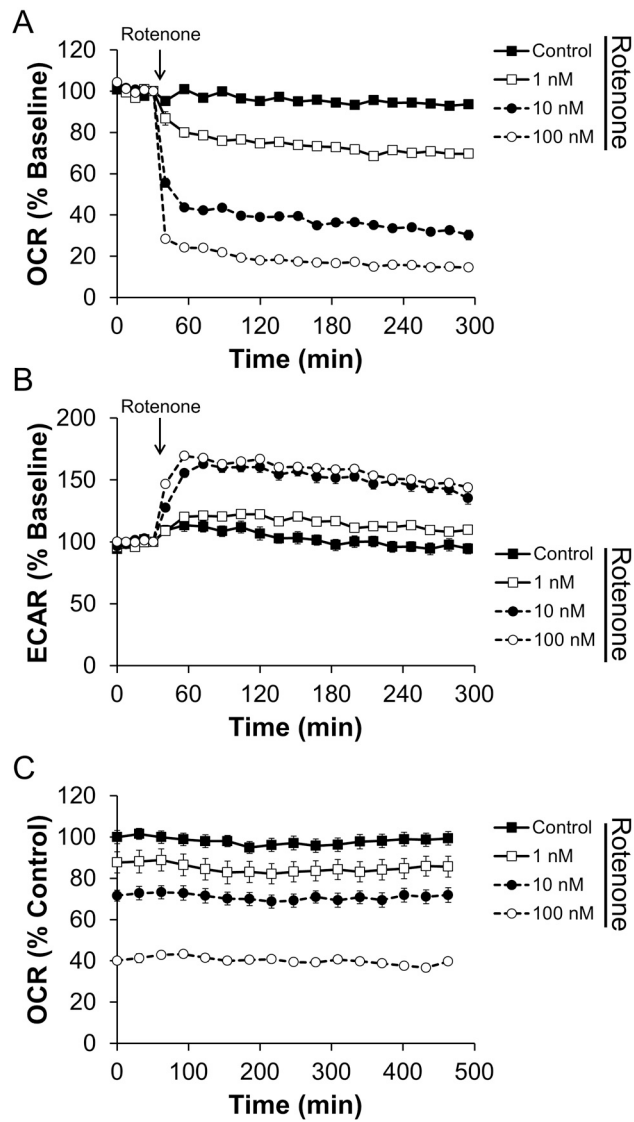

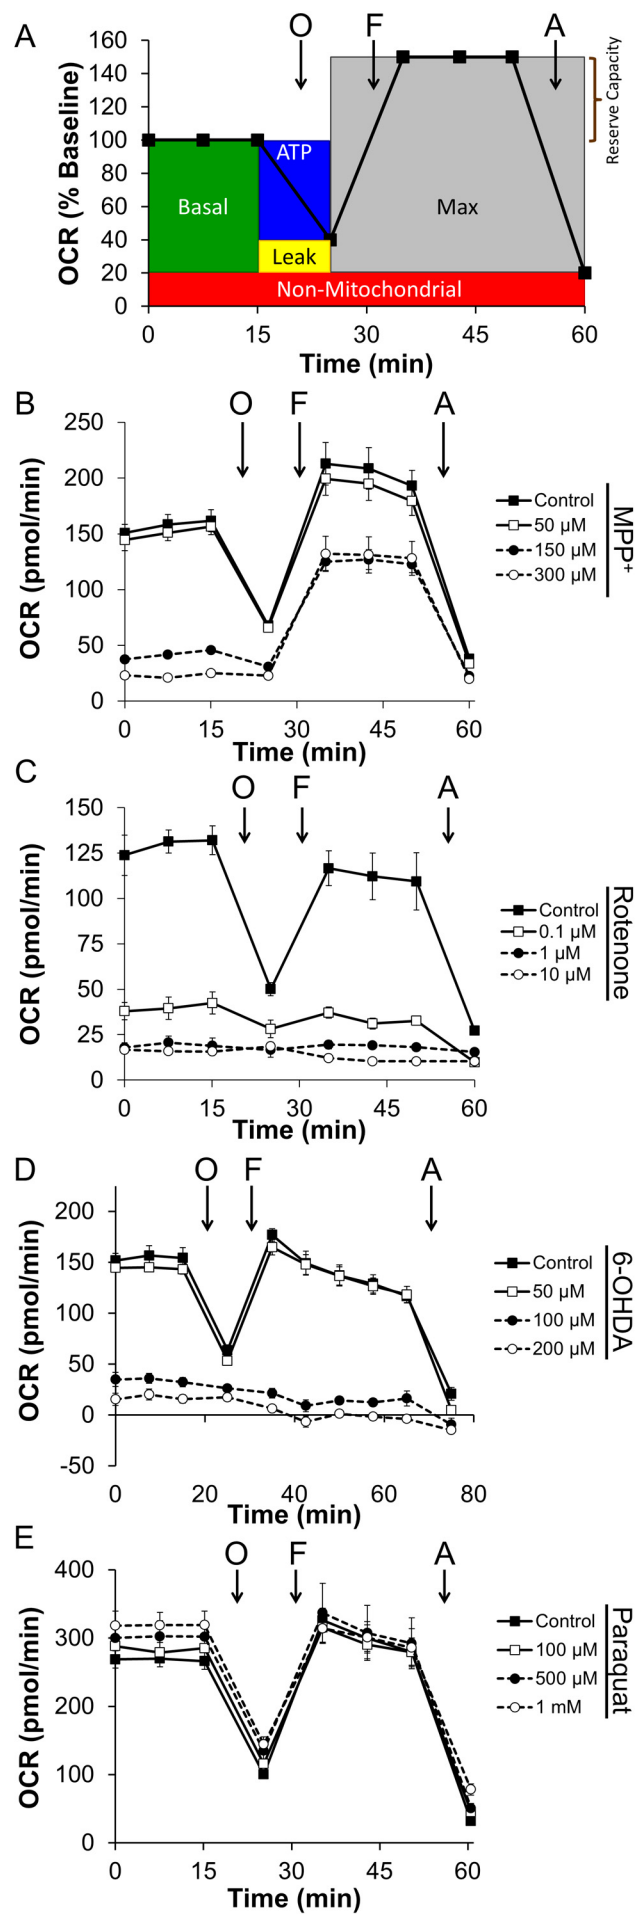

Supplement: NIHMS387370-supplement-Supp_Figure_S1-S4.pdf [file NIHMS387370-supplement-Supp_Figure_S1-S4.pdf]
